# Supplementary material for: Metabolic and Transcriptional Adaptations Improve Physical Performance of Zebrafish
Source: MDPI journal article supplement (doi:10.3390/antiox10101581), 2021-10-07
Supplement: s1 [file s1]

## Initial maximum speed

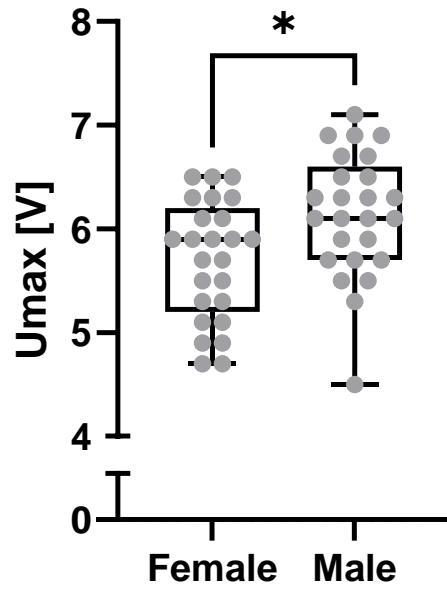

**Figure S1:** Initial maximum speed was higher in male than in female fish ( $p=0.011$ ). Maximum speed performance was assessed from all fish at the beginning of the experiments.  $N=25$  fish per group. Two-tailed unpaired t-test.  $*p<0.05$ .

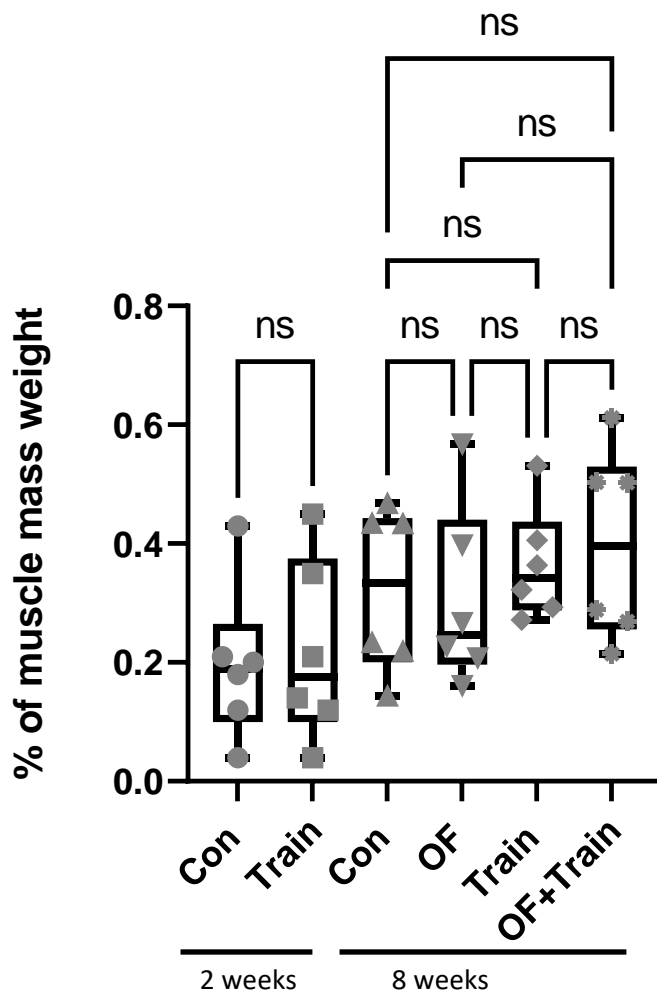

**Figure S2:** Glycogen content in zebrafish muscle. Glycogen content did not change significantly in muscle after 2 and 8 weeks of training.
